# Supplementary material
Source: PubMed Central journal article supplement (PMC5929211)
Supplement: tpmd170676.SD1.pdf [file tpmd170676.SD1.pdf]

## A) World

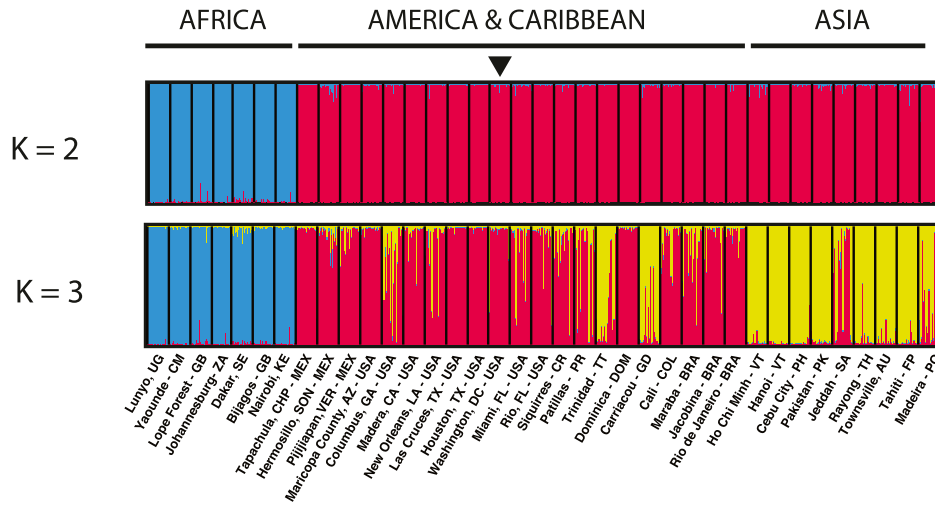

## B) Out of Africa

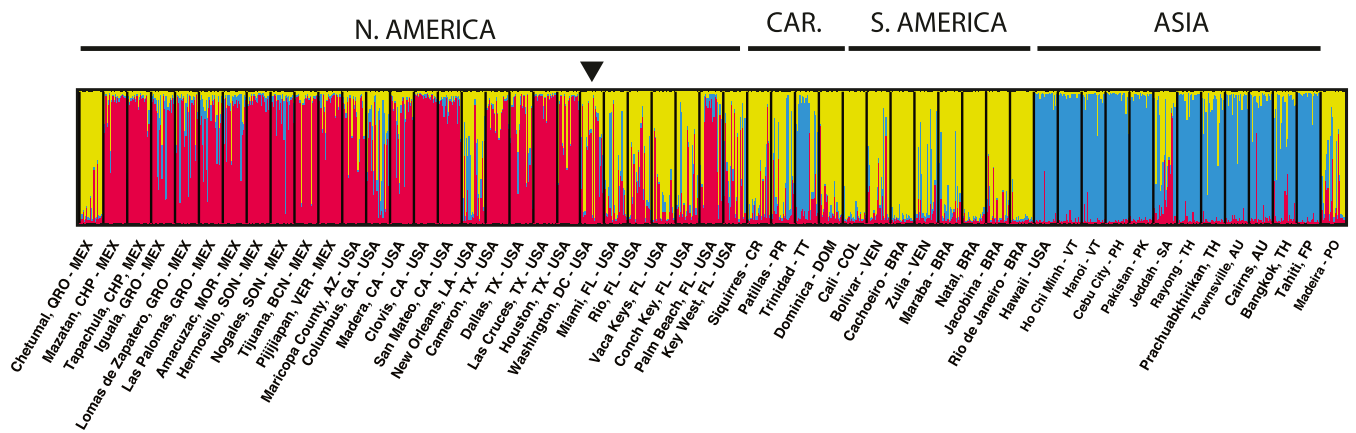

SUPPLEMENTAL FIGURE 1. Genetic structure of *Aedes aegypti* populations based on 12 microsatellite loci. Panel shows the STRUCTURE bar plot indicating relatedness among geographic locations. Each vertical bar represents an individual. The height of each bar represents the probability of assignment to each of  $K$  clusters (each cluster depicted by different colors). An arrow above the panel indicates the location of Washington, DC. (A) World populations at  $K = 2$  and  $K = 3$ . (B) Outside Africa populations at  $K = 3$ . CAR = Caribbean.

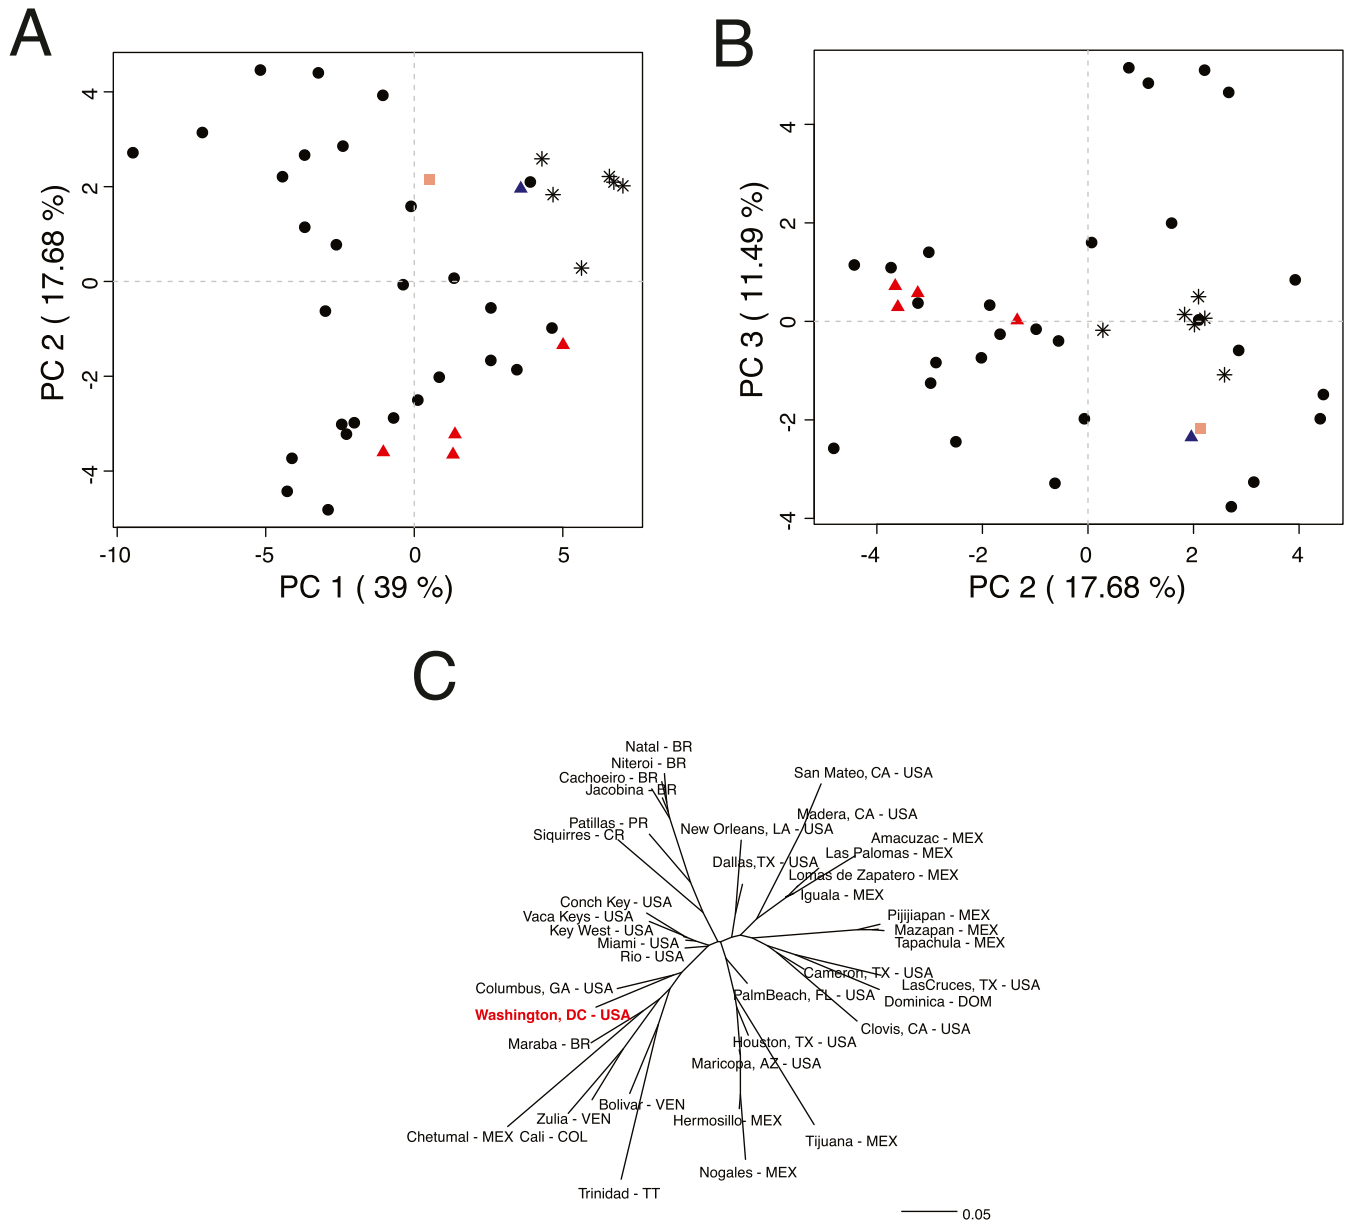

SUPPLEMENTAL FIGURE 2. Genetic distance between Washington, DC, *Aedes aegypti* and American populations based on 12 microsatellite loci. **(A, B)** Principal component analysis on genetic distance<sup>39</sup> among 53 American and Caribbean collections (Table 1). Washington, DC, is indicated by a pink square, Columbus, GA by a blue triangle, Florida populations by stars, and Texas populations by red triangles. The percentage of variation explained by each of the principal components is indicated in parenthesis. **(C)** Neighbor joining tree based on the genetic distances used in a **(A)** and **(B)**.

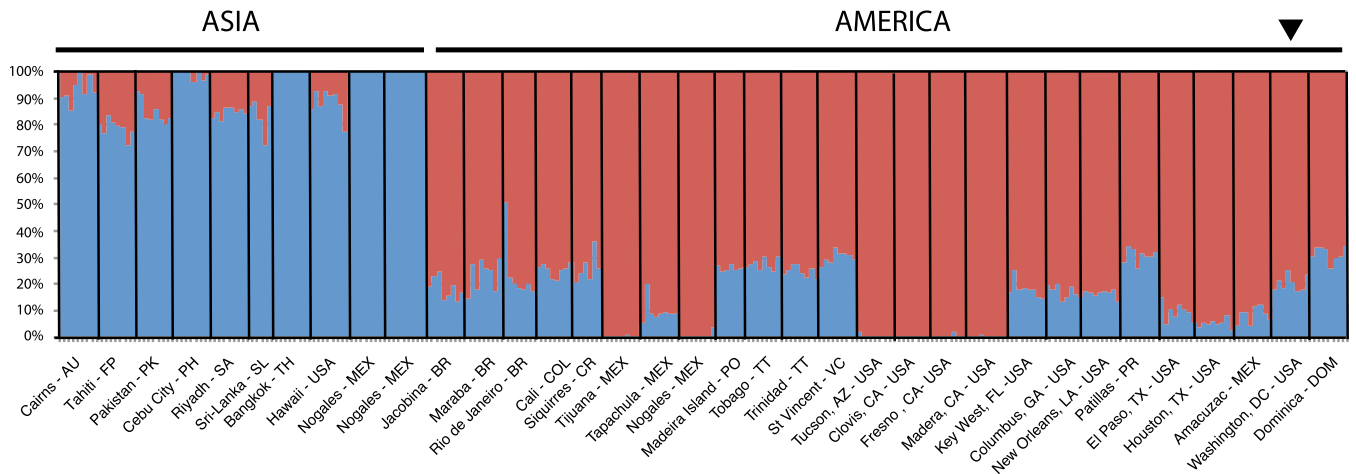

SUPPLEMENTAL FIGURE 3. Genetic structure of *Aedes aegypti* populations around the world based on 14,071 SNPs. Panel shows the ADMIXTURE bar plot indicating relatedness among geographic regions. Each vertical bar represents an individual. The height of each bar represents the probability of assignment to each of  $K = 2$  clusters (each cluster depicted by different colors). An arrow above the panel indicates the location of Washington, DC.

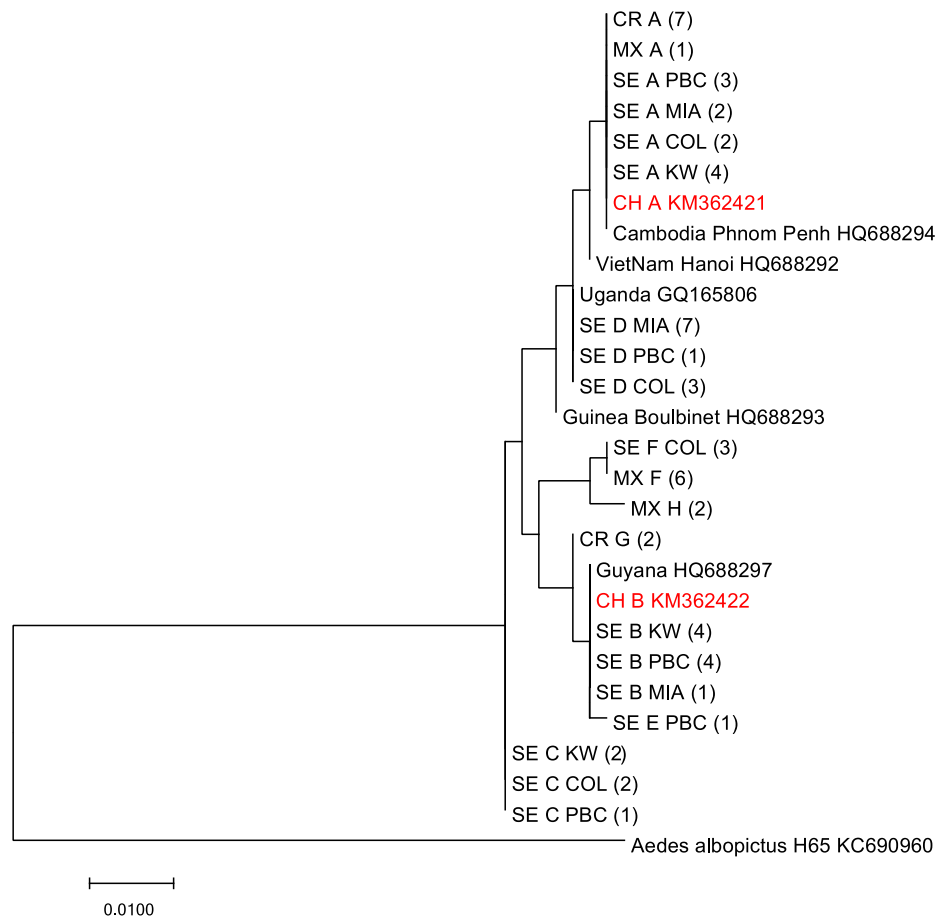

SUPPLEMENTAL FIGURE 4. Phylogenetic tree constructed with a consensus 497 bp of the mitochondrial cytochrome oxidase I gene sequence showing each regional haplotype with the number of individuals possessing the haplotype in parantheses (SE = southeastern United States; CR = Costa Rica; MX = Mexico; and CH = Capitol Hill area in Washington DC). The analysis included sequences from 5 various geographic regions obtained from GenBank and using an *Aedes albopictus* sequence as an outgroup.

SUPPLEMENTAL TABLE 1

Genetic diversity of *Aedes aegypti* collections from America and the Caribbean based on 12 microsatellite loci

| Population                  | Region          | $H_o^*$ | $H_e^\dagger$ | AR‡  | PAR§ |
|-----------------------------|-----------------|---------|---------------|------|------|
| Maricopa County, AZ, USA    | North America   | 0.554   | 0.557         | 3.98 | 0    |
| Tijuana, BC, MEX            | North America   | 0.625   | 0.550         | 2.92 | 0    |
| Madera, CA, USA             | North America   | 0.533   | 0.541         | 3.68 | 0    |
| Clovis, CA, USA             | North America   | 0.451   | 0.489         | 3.3  | 0    |
| Houston, TX, USA            | North America   | 0.439   | 0.416         | 3.08 | 0    |
| Pijijiapan, CHP, MEX        | North America   | 0.391   | 0.458         | 3.19 | 0    |
| Cali, CO                    | South America   | 0.448   | 0.502         | 3.53 | 0.03 |
| Bolivar, VEN                | South America   | 0.523   | 0.547         | 3.9  | 0.04 |
| Cachoeiro, BR               | South America   | 0.463   | 0.495         | 3.59 | 0.01 |
| Zulia, VEN                  | South America   | 0.550   | 0.532         | 3.76 | 0    |
| Maraba, BR                  | South America   | 0.521   | 0.554         | 3.77 | 0.03 |
| Natal, BR                   | South America   | 0.504   | 0.497         | 3.49 | 0.02 |
| Miami, FL, USA              | North America   | 0.674   | 0.631         | 4.76 | 0.08 |
| Las Palomas, GRO, MEX       | North America   | 0.560   | 0.573         | 3.62 | 0.01 |
| Lomas de Zapatero, GRO, MEX | North America   | 0.560   | 0.553         | 3.74 | 0.05 |
| Iguala, GRO, MEX            | North America   | 0.573   | 0.565         | 3.81 | 0.03 |
| Mazatan, CHP MEX            | North America   | 0.511   | 0.474         | 3.16 | 0    |
| Columbus, GA, USA           | North America   | 0.645   | 0.636         | 4.51 | 0.07 |
| Tapachula Norte, CHP, MEX   | North America   | 0.502   | 0.499         | 3.42 | 0    |
| Jacobina, BR                | South America   | 0.425   | 0.453         | 3.47 | 0.06 |
| San Mateo, CA, USA          | North America   | 0.492   | 0.508         | 3.81 | 0    |
| Hermosillo, SON, MEX        | North America   | 0.541   | 0.561         | 3.95 | 0.03 |
| Nogales, SON, MEX           | North America   | 0.551   | 0.558         | 3.86 | 0.05 |
| Chetumal, QRO, MEX          | North America   | 0.535   | 0.493         | 3.53 | 0.06 |
| Siquirres, CR               | Central America | 0.545   | 0.607         | 4.1  | 0.01 |
| Rio de Janeiro, BR          | South America   | 0.407   | 0.472         | 4.01 | 0.15 |
| Rio, FL, USA                | North America   | 0.609   | 0.627         | 4.52 | 0.01 |
| Conch Key, FL, USA          | North America   | 0.599   | 0.604         | 4.33 | 0.08 |
| Palm Beach, FL, USA         | North America   | 0.595   | 0.618         | 4.33 | 0    |
| Patillas, PR                | Caribbean       | 0.574   | 0.536         | 4.12 | 0    |
| Trinidad, TT                | Caribbean       | 0.472   | 0.532         | 4.01 | 0.01 |
| Dominica, DM                | Caribbean       | 0.432   | 0.454         | 3.29 | 0.08 |
| Cameron, TX, USA            | North America   | 0.489   | 0.489         | 3.89 | 0.06 |
| Dallas, TX, USA             | North America   | 0.551   | 0.562         | 4.44 | 0.07 |
| Las Cruces, TX, USA         | North America   | 0.534   | 0.523         | 3.8  | 0.16 |
| Vaca Key, FL, USA           | North America   | 0.592   | 0.604         | 4.4  | 0.02 |
| North Key West, FL, USA     | North America   | 0.648   | 0.625         | 4.5  | 0    |
| New Orleans, LA, USA        | North America   | 0.604   | 0.620         | 4.51 | 0    |
| Amacuzac, MOR, MEX          | North America   | 0.532   | 0.490         | 3.52 | 0.02 |
| Washington, DC, USA         | North America   | 0.493   | 0.548         | 3.73 | 0.06 |

\* Observed heterozygosity.

† Corrected expected heterozygosity.

‡ Average allele richness across all 12 microsatellite loci estimated by rarefaction ( $N = 38$  genes).§ Average private allele richness across all 12 microsatellite loci estimated by rarefaction ( $N = 38$  genes).

SUPPLEMENTAL TABLE 2

Population assignment rankings of genetically assigning Washington, DC, individuals to the American reference database using 12 microsatellite loci

| Assigned sample | Rank 1         | Score % | Rank 2                 | Score % | Rank 3                 | Score % |
|-----------------|----------------|---------|------------------------|---------|------------------------|---------|
| DC14_70         | Miami, FL      | 60.81   | Key West, FL           | 22.508  | Zulia, VEN             | 10.662  |
| DC14_71         | Patillas, PR   | 76.521  | Cachoeiro, BR          | 11.983  | Lomas de Zapatero, MEX | 4.443   |
| DC14_72         | Maricopa, AZ   | 33.127  | Columbus, GA           | 23.441  | Chetumal, MEX          | 22.649  |
| DC14_73         | Palm Beach, FL | 72.886  | Conch Key, FL          | 7.824   | Columbus, GA           | 6.29    |
| DC14_74         | Conch Key, FL  | 52.791  | Palm Beach, FL         | 38.633  | Miami, FL              | 4.348   |
| DC14_75         | Palm Beach, FL | 55.803  | Miami, FL              | 21.099  | Key West, FL           | 10.699  |
| DC14_76         | Palm Beach, FL | 65.169  | Conch Key, FL          | 18.714  | Vaca Key, FL           | 5.443   |
| DC14_78         | Key West, FL   | 40.261  | Lomas de Zapatero, MEX | 26.976  | Miami, FL              | 21.382  |
| DC14_79         | Columbus, GA   | 84.619  | Maricopa, AZ           | 7.472   | Dallas, TX             | 5.466   |
| DC14_80         | Zulia, VEN     | 63.733  | Miami, FL              | 26.725  | Key West, FL           | 6.841   |
| DC14_81         | Palm Beach, FL | 77.02   | Conch Key, FL          | 14.332  | Houston, TX            | 2.721   |
| DC14_82         | Rio, FL        | 44.323  | Zulia, VEN             | 30.716  | Clovis, CA             | 8.311   |
| DC14_83         | Columbus, GA   | 50.549  | Rio, FL                | 38.6    | Zulia, VEN             | 4.252   |
| DC14_84         | Conch Key, FL  | 66.533  | Miami, FL              | 9.196   | Cali, CO               | 7.169   |
| DC14_85         | Clovis, CA     | 42.237  | Las Palomas, MEX       | 18.949  | Lomas de Zapatero, MEX | 18.564  |
| DC14_86         | Dallas, TX     | 73.311  | Columbus, GA           | 7.145   | Las Palomas, MEX       | 4.452   |
| DC14_87         | Conch Key, FL  | 72.543  | Miami, FL              | 8.304   | Vaca Key, FL           | 6.949   |
| DC14_88         | Conch Key, FL  | 94.848  | Palm Beach, FL         | 1.669   | Maricopa, AZ           | 1.289   |
| DC14_89         | Maricopa, AZ   | 40.059  | Dallas, TX             | 30.606  | Columbus, GA           | 20.975  |
| DC14_90         | Palm Beach, FL | 56.855  | New Orleans, LA        | 11.374  | Rio, FL                | 10.398  |
| DC14_91         | Zulia, VEN     | 45.138  | Rio, FL                | 17.527  | Dallas, TX             | 10.988  |
| DC14_92         | Columbus, GA   | 55.064  | Rio, FL                | 14.436  | Maricopa, AZ           | 9.614   |
| DC14_93         | Siquirres, CR  | 60.402  | New Orleans, LA        | 12.781  | Palm Beach, FL         | 6.282   |
| DC14_94         | Palm Beach, FL | 75.873  | Rio, FL                | 7.076   | Key West, FL           | 6.45    |
| DC14_95         | Palm Beach, FL | 72.899  | Columbus, GA           | 10.636  | Dallas, TX             | 3.564   |
| DC14_97         | Maricopa, AZ   | 40.996  | Palm Beach, FL         | 21.198  | Rio, FL                | 14.137  |
| DC14_98         | Palm Beach, FL | 57.577  | Zulia, VEN             | 34.554  | Key West, FL           | 4.929   |

SUPPLEMENTAL TABLE 3  
Population assignment rankings of genetically assigning Washington, DC, individuals to the American reference database using sets of 4,000 random SNPs.

| Assigned sample | Rank 1               | Score % | Rank 2                    | Score % | Rank 3                    | Score % | Rank 4                    | Score % | Rank 5                    | Score % |
|-----------------|----------------------|---------|---------------------------|---------|---------------------------|---------|---------------------------|---------|---------------------------|---------|
| RUN1            |                      |         |                           |         |                           |         |                           |         |                           |         |
| Wash_DC.CH.70   | Key_west_Florida_USA | 100     | Columbus_Georgia_USA      | 0       | Squirres_CR               | 0       | Patillas_USA_PR           | 0       | Amacuzac_MEX              | 0       |
| Wash_DC.CH.95   | Key_west_Florida_USA | 100     | Columbus_Georgia_USA      | 0       | Squirres_CR               | 0       | El_Paso_Texas_USA         | 0       | Patillas_USA_PR           | 0       |
| Wash_DC.CH.79   | Key_west_Florida_USA | 100     | Patillas_USA_PR           | 0       | Squirres_CR               | 0       | Columbus_Georgia_USA      | 0       | New_Orleans_Louisiana_USA | 0       |
| Wash_DC.CH.97   | Key_west_Florida_USA | 100     | Columbus_Georgia_USA      | 0       | Squirres_CR               | 0       | El_Paso_Texas_USA         | 0       | Patillas_USA_PR           | 0       |
| Wash_DC.CH.98   | Key_west_Florida_USA | 100     | Columbus_Georgia_USA      | 0       | Squirres_CR               | 0       | Patillas_USA_PR           | 0       | New_Orleans_Louisiana_USA | 0       |
| Wash_DC.CH.87   | Key_west_Florida_USA | 100     | Patillas_USA_PR           | 0       | New_Orleans_Louisiana_USA | 0       | Squirres_CR               | 0       | Columbus_Georgia_USA      | 0       |
| Wash_DC.DC14_70 | Key_west_Florida_USA | 100     | Columbus_Georgia_USA      | 0       | Squirres_CR               | 0       | Patillas_USA_PR           | 0       | Amacuzac_MEX              | 0       |
| Wash_DC.CH.92   | Key_west_Florida_USA | 100     | Squirres_CR               | 0       | Columbus_Georgia_USA      | 0       | Patillas_USA_PR           | 0       | El_Paso_Texas_USA         | 0       |
| Wash_DC.CH.92   | Squirres_CR          | 100     | Key_west_Florida_USA      | 0       | Columbus_Georgia_USA      | 0       | El_Paso_Texas_USA         | 0       | Patillas_USA_PR           | 0       |
| Wash_DC.CH.93   | Squirres_CR          | 100     | Columbus_Georgia_USA      | 0       | El_Paso_Texas_USA         | 0       | Squirres_CR               | 0       | New_Orleans_Louisiana_USA | 0       |
| Wash_DC.CH.94   | Key_west_Florida_USA | 100     | Columbus_Georgia_USA      | 0       | El_Paso_Texas_USA         | 0       | Squirres_CR               | 0       | Patillas_USA_PR           | 0       |
| Wash_DC.DC14_71 | Key_west_Florida_USA | 100     | Columbus_Georgia_USA      | 0       | Squirres_CR               | 0       | New_Orleans_Louisiana_USA | 0       | Patillas_USA_PR           | 0       |
| Wash_DC.DC14_73 | Key_west_Florida_USA | 100     | Patillas_USA_PR           | 0       | Squirres_CR               | 0       | New_Orleans_Louisiana_USA | 0       | Columbus_Georgia_USA      | 0       |
| Wash_DC.DC14_75 | Columbus_Georgia_USA | 100     | Key_west_Florida_USA      | 0       | El_Paso_Texas_USA         | 0       | Squirres_CR               | 0       | New_Orleans_Louisiana_USA | 0       |
| Wash_DC.DC14_82 | Key_west_Florida_USA | 100     | Columbus_Georgia_USA      | 0       | Squirres_CR               | 0       | Patillas_USA_PR           | 0       | El_Paso_Texas_USA         | 0       |
| Wash_DC.DC14_83 | Columbus_Georgia_USA | 100     | Key_west_Florida_USA      | 0       | El_Paso_Texas_USA         | 0       | Squirres_CR               | 0       | New_Orleans_Louisiana_USA | 0       |
| Wash_DC.DC14_84 | Key_west_Florida_USA | 100     | Patillas_USA_PR           | 0       | Squirres_CR               | 0       | Columbus_Georgia_USA      | 0       | El_Paso_Texas_USA         | 0       |
| RUN2            |                      |         |                           |         |                           |         |                           |         |                           |         |
| Wash_DC.CH.70   | Columbus_Georgia_USA | 52.705  | Key_west_Florida_USA      | 47.295  | Patillas_USA_PR           | 0       | Squirres_CR               | 0       | Amacuzac_MEX              | 0       |
| Wash_DC.CH.95   | Columbus_Georgia_USA | 100     | Key_west_Florida_USA      | 0       | Squirres_CR               | 0       | El_Paso_Texas_USA         | 0       | New_Orleans_Louisiana_USA | 0       |
| Wash_DC.CH.79   | Key_west_Florida_USA | 100     | New_Orleans_Louisiana_USA | 0       | Squirres_CR               | 0       | Columbus_Georgia_USA      | 0       | Patillas_USA_PR           | 0       |
| Wash_DC.CH.97   | Key_west_Florida_USA | 100     | Columbus_Georgia_USA      | 0       | Squirres_CR               | 0       | El_Paso_Texas_USA         | 0       | New_Orleans_Louisiana_USA | 0       |
| Wash_DC.CH.98   | Key_west_Florida_USA | 100     | Columbus_Georgia_USA      | 0       | Patillas_USA_PR           | 0       | New_Orleans_Louisiana_USA | 0       | Squirres_CR               | 0       |
| Wash_DC.CH.87   | Key_west_Florida_USA | 100     | Columbus_Georgia_USA      | 0       | Squirres_CR               | 0       | Patillas_USA_PR           | 0       | El_Paso_Texas_USA         | 0       |
| Wash_DC.DC14_70 | Key_west_Florida_USA | 100     | Columbus_Georgia_USA      | 0       | Amacuzac_MEX              | 0       | Patillas_USA_PR           | 0       | Squirres_CR               | 0       |
| Wash_DC.CH.92   | Key_west_Florida_USA | 100     | Columbus_Georgia_USA      | 0       | El_Paso_Texas_USA         | 0       | New_Orleans_Louisiana_USA | 0       | Patillas_USA_PR           | 0       |
| Wash_DC.CH.93   | Squirres_CR          | 100     | Columbus_Georgia_USA      | 0       | Key_west_Florida_USA      | 0       | New_Orleans_Louisiana_USA | 0       | New_Orleans_Louisiana_USA | 0       |
| Wash_DC.CH.94   | Columbus_Georgia_USA | 100     | Key_west_Florida_USA      | 0       | El_Paso_Texas_USA         | 0       | Squirres_CR               | 0       | New_Orleans_Louisiana_USA | 0       |
| Wash_DC.DC14_71 | Key_west_Florida_USA | 100     | Columbus_Georgia_USA      | 0       | New_Orleans_Louisiana_USA | 0       | Squirres_CR               | 0       | Patillas_USA_PR           | 0       |
| Wash_DC.DC14_73 | Key_west_Florida_USA | 100     | Squirres_CR               | 0       | Columbus_Georgia_USA      | 0       | Patillas_USA_PR           | 0       | El_Paso_Texas_USA         | 0       |
| Wash_DC.DC14_75 | Columbus_Georgia_USA | 100     | Key_west_Florida_USA      | 0       | Squirres_CR               | 0       | El_Paso_Texas_USA         | 0       | New_Orleans_Louisiana_USA | 0       |
| Wash_DC.DC14_82 | Key_west_Florida_USA | 100     | Columbus_Georgia_USA      | 0       | Patillas_USA_PR           | 0       | New_Orleans_Louisiana_USA | 0       | Squirres_CR               | 0       |
| Wash_DC.DC14_83 | Columbus_Georgia_USA | 100     | Key_west_Florida_USA      | 0       | El_Paso_Texas_USA         | 0       | New_Orleans_Louisiana_USA | 0       | Squirres_CR               | 0       |
| Wash_DC.DC14_84 | Key_west_Florida_USA | 100     | Columbus_Georgia_USA      | 0       | Patillas_USA_PR           | 0       | Squirres_CR               | 0       | El_Paso_Texas_USA         | 0       |
| RUN3            |                      |         |                           |         |                           |         |                           |         |                           |         |
| Wash_DC.CH.70   | Key_west_Florida_USA | 100     | Columbus_Georgia_USA      | 0       | Amacuzac_MEX              | 0       | Patillas_USA_PR           | 0       | Squirres_CR               | 0       |
| Wash_DC.CH.95   | Key_west_Florida_USA | 100     | Columbus_Georgia_USA      | 0       | Squirres_CR               | 0       | El_Paso_Texas_USA         | 0       | New_Orleans_Louisiana_USA | 0       |
| Wash_DC.CH.79   | Key_west_Florida_USA | 100     | Patillas_USA_PR           | 0       | Squirres_CR               | 0       | Columbus_Georgia_USA      | 0       | New_Orleans_Louisiana_USA | 0       |
| Wash_DC.CH.97   | Key_west_Florida_USA | 100     | Columbus_Georgia_USA      | 0       | Squirres_CR               | 0       | El_Paso_Texas_USA         | 0       | New_Orleans_Louisiana_USA | 0       |
| Wash_DC.CH.98   | Key_west_Florida_USA | 100     | Columbus_Georgia_USA      | 0       | Squirres_CR               | 0       | Squirres_CR               | 0       | New_Orleans_Louisiana_USA | 0       |
| Wash_DC.CH.87   | Key_west_Florida_USA | 100     | Patillas_USA_PR           | 0       | Columbus_Georgia_USA      | 0       | Squirres_CR               | 0       | New_Orleans_Louisiana_USA | 0       |
| Wash_DC.DC14_70 | Key_west_Florida_USA | 100     | Columbus_Georgia_USA      | 0       | Amacuzac_MEX              | 0       | Patillas_USA_PR           | 0       | Squirres_CR               | 0       |
| Wash_DC.CH.92   | Key_west_Florida_USA | 100     | Columbus_Georgia_USA      | 0       | Squirres_CR               | 0       | Patillas_USA_PR           | 0       | New_Orleans_Louisiana_USA | 0       |
| Wash_DC.CH.93   | Squirres_CR          | 98.661  | Columbus_Georgia_USA      | 1.339   | Key_west_Florida_USA      | 0       | Patillas_USA_PR           | 0       | El_Paso_Texas_USA         | 0       |
| Wash_DC.CH.94   | Key_west_Florida_USA | 100     | Columbus_Georgia_USA      | 0       | El_Paso_Texas_USA         | 0       | Patillas_USA_PR           | 0       | Squirres_CR               | 0       |
| Wash_DC.DC14_71 | Key_west_Florida_USA | 100     | Columbus_Georgia_USA      | 0       | Patillas_USA_PR           | 0       | Squirres_CR               | 0       | New_Orleans_Louisiana_USA | 0       |
| Wash_DC.DC14_73 | Key_west_Florida_USA | 100     | Patillas_USA_PR           | 0       | Squirres_CR               | 0       | Squirres_CR               | 0       | New_Orleans_Louisiana_USA | 0       |
| Wash_DC.DC14_75 | Key_west_Florida_USA | 99.546  | Columbus_Georgia_USA      | 0.454   | Squirres_CR               | 0       | New_Orleans_Louisiana_USA | 0       | El_Paso_Texas_USA         | 0       |
| Wash_DC.DC14_82 | Key_west_Florida_USA | 100     | Columbus_Georgia_USA      | 0       | Squirres_CR               | 0       | Patillas_USA_PR           | 0       | New_Orleans_Louisiana_USA | 0       |
| Wash_DC.DC14_83 | Columbus_Georgia_USA | 100     | Key_west_Florida_USA      | 0       | Squirres_CR               | 0       | El_Paso_Texas_USA         | 0       | New_Orleans_Louisiana_USA | 0       |
| Wash_DC.DC14_84 | Key_west_Florida_USA | 100     | Patillas_USA_PR           | 0       | Columbus_Georgia_USA      | 0       | Squirres_CR               | 0       | El_Paso_Texas_USA         | 0       |
| RUN4            |                      |         |                           |         |                           |         |                           |         |                           |         |
| Wash_DC.CH.70   | Key_west_Florida_USA | 100     | Columbus_Georgia_USA      | 0       | Squirres_CR               | 0       | Patillas_USA_PR           | 0       | Amacuzac_MEX              | 0       |
| Wash_DC.CH.95   | Key_west_Florida_USA | 100     | Columbus_Georgia_USA      | 0       | El_Paso_Texas_USA         | 0       | Squirres_CR               | 0       | Patillas_USA_PR           | 0       |
| Wash_DC.CH.79   | Key_west_Florida_USA | 100     | Squirres_CR               | 0       | Patillas_USA_PR           | 0       | Columbus_Georgia_USA      | 0       | New_Orleans_Louisiana_USA | 0       |
| Wash_DC.CH.97   | Key_west_Florida_USA | 100     | Squirres_CR               | 0       | Patillas_USA_PR           | 0       | Columbus_Georgia_USA      | 0       | New_Orleans_Louisiana_USA | 0       |
| Wash_DC.CH.98   | Key_west_Florida_USA | 100     | Squirres_CR               | 0       | Patillas_USA_PR           | 0       | Columbus_Georgia_USA      | 0       | El_Paso_Texas_USA         | 0       |
| Wash_DC.CH.87   | Key_west_Florida_USA | 100     | Squirres_CR               | 0       | Patillas_USA_PR           | 0       | Columbus_Georgia_USA      | 0       | Amacuzac_MEX              | 0       |
| Wash_DC.DC14_70 | Key_west_Florida_USA | 100     | Squirres_CR               | 0       | Patillas_USA_PR           | 0       | Columbus_Georgia_USA      | 0       | New_Orleans_Louisiana_USA | 0       |
| Wash_DC.CH.92   | Key_west_Florida_USA | 100     | Squirres_CR               | 0       | Patillas_USA_PR           | 0       | Columbus_Georgia_USA      | 0       | Amacuzac_MEX              | 0       |
| Wash_DC.CH.93   | Squirres_CR          | 99.991  | Key_west_Florida_USA      | 0.009   | Squirres_CR               | 0       | Patillas_USA_PR           | 0       | Amacuzac_MEX              | 0       |
| Wash_DC.CH.94   | Key_west_Florida_USA | 100     | Columbus_Georgia_USA      | 0       | El_Paso_Texas_USA         | 0       | Patillas_USA_PR           | 0       | Patillas_USA_PR           | 0       |
| Wash_DC.DC14_71 | Key_west_Florida_USA | 100     | Squirres_CR               | 0       | Patillas_USA_PR           | 0       | Columbus_Georgia_USA      | 0       | New_Orleans_Louisiana_USA | 0       |
| Wash_DC.DC14_73 | Key_west_Florida_USA | 100     | Squirres_CR               | 0       | Patillas_USA_PR           | 0       | Columbus_Georgia_USA      | 0       | New_Orleans_Louisiana_USA | 0       |
| Wash_DC.DC14_75 | Key_west_Florida_USA | 100     | Columbus_Georgia_USA      | 0       | Squirres_CR               | 0       | El_Paso_Texas_USA         | 0       | Patillas_USA_PR           | 0       |

(continued)

SUPPLEMENTAL TABLE 3  
Continued

| Assigned sample | Rank 1               | Score % | Rank 2               | Score % | Rank 3               | Score % | Rank 4                    | Score % | Rank 5                    | Score % |
|-----------------|----------------------|---------|----------------------|---------|----------------------|---------|---------------------------|---------|---------------------------|---------|
| Wash_DC_DC14_82 | Key_west_Florida_USA | 100     | Squirres_CR          | 0       | Columbus_Georgia_USA | 0       | El_Paso_Texas_USA         | 0       | Patillas_USA_PR           | 0       |
| Wash_DC_DC14_83 | Key_west_Florida_USA | 60.985  | Columbus_Georgia_USA | 39.005  | Squirres_CR          | 0       | El_Paso_Texas_USA         | 0       | New_Orleans_Louisiana_USA | 0       |
| Wash_DC_DC14_84 | Key_west_Florida_USA | 100     | Squirres_CR          | 0       | Patillas_USA_PR      | 0       | Columbus_Georgia_USA      | 0       | El_Paso_Texas_USA         | 0       |
| RUN5            |                      |         |                      |         |                      |         |                           |         |                           |         |
| Wash_DC_CH_70   | Key_west_Florida_USA | 99.989  | Columbus_Georgia_USA | 0.001   | Patillas_USA_PR      | 0       | Squirres_CR               | 0       | Dominica_DOM              | 0       |
| Wash_DC_CH_95   | Key_west_Florida_USA | 100     | Columbus_Georgia_USA | 0       | Squirres_CR          | 0       | El_Paso_Texas_USA         | 0       | New_Orleans_Louisiana_USA | 0       |
| Wash_DC_CH_79   | Key_west_Florida_USA | 100     | Squirres_CR          | 0       | Patillas_USA_PR      | 0       | New_Orleans_Louisiana_USA | 0       | Columbus_Georgia_USA      | 0       |
| Wash_DC_CH_97   | Key_west_Florida_USA | 100     | Columbus_Georgia_USA | 0       | Squirres_CR          | 0       | El_Paso_Texas_USA         | 0       | Patillas_USA_PR           | 0       |
| Wash_DC_CH_98   | Key_west_Florida_USA | 100     | Columbus_Georgia_USA | 0       | Squirres_CR          | 0       | Patillas_USA_PR           | 0       | El_Paso_Texas_USA         | 0       |
| Wash_DC_CH_87   | Key_west_Florida_USA | 100     | Columbus_Georgia_USA | 0       | Squirres_CR          | 0       | Patillas_USA_PR           | 0       | New_Orleans_Louisiana_USA | 0       |
| Wash_DC_DC14_70 | Key_west_Florida_USA | 100     | Columbus_Georgia_USA | 0       | Squirres_CR          | 0       | Patillas_USA_PR           | 0       | Amacuzac_MEX              | 0       |
| Wash_DC_CH_92   | Key_west_Florida_USA | 100     | Squirres_CR          | 0       | Columbus_Georgia_USA | 0       | El_Paso_Texas_USA         | 0       | Patillas_USA_PR           | 0       |
| Wash_DC_CH_93   | Squirres_CR          | 100     | Key_west_Florida_USA | 0       | Patillas_USA_PR      | 0       | Patillas_USA_PR           | 0       | El_Paso_Texas_USA         | 0       |
| Wash_DC_CH_94   | Key_west_Florida_USA | 100     | Columbus_Georgia_USA | 0       | El_Paso_Texas_USA    | 0       | Patillas_USA_PR           | 0       | Amacuzac_MEX              | 0       |
| Wash_DC_DC14_71 | Key_west_Florida_USA | 100     | Squirres_CR          | 0       | Patillas_USA_PR      | 0       | Columbus_Georgia_USA      | 0       | New_Orleans_Louisiana_USA | 0       |
| Wash_DC_DC14_73 | Key_west_Florida_USA | 100     | Squirres_CR          | 0       | Patillas_USA_PR      | 0       | Columbus_Georgia_USA      | 0       | New_Orleans_Louisiana_USA | 0       |
| Wash_DC_DC14_75 | Columbus_Georgia_USA | 100     | Key_west_Florida_USA | 0       | Squirres_CR          | 0       | El_Paso_Texas_USA         | 0       | Patillas_USA_PR           | 0       |
| Wash_DC_DC14_82 | Key_west_Florida_USA | 100     | Columbus_Georgia_USA | 0       | Squirres_CR          | 0       | New_Orleans_Louisiana_USA | 0       | Patillas_USA_PR           | 0       |
| Wash_DC_DC14_83 | Columbus_Georgia_USA | 100     | Key_west_Florida_USA | 0       | Squirres_CR          | 0       | Squirres_CR               | 0       | El_Paso_Texas_USA         | 0       |
| Wash_DC_DC14_84 | Key_west_Florida_USA | 100     | Squirres_CR          | 0       | Columbus_Georgia_USA | 0       | Patillas_USA_PR           | 0       | El_Paso_Texas_USA         | 0       |
| RUN6            |                      |         |                      |         |                      |         |                           |         |                           |         |
| Wash_DC_CH_70   | Key_west_Florida_USA | 100     | Columbus_Georgia_USA | 0       | Squirres_CR          | 0       | Patillas_USA_PR           | 0       | New_Orleans_Louisiana_USA | 0       |
| Wash_DC_CH_95   | Key_west_Florida_USA | 100     | Columbus_Georgia_USA | 0       | Squirres_CR          | 0       | El_Paso_Texas_USA         | 0       | New_Orleans_Louisiana_USA | 0       |
| Wash_DC_CH_79   | Key_west_Florida_USA | 100     | Squirres_CR          | 0       | Columbus_Georgia_USA | 0       | Patillas_USA_PR           | 0       | New_Orleans_Louisiana_USA | 0       |
| Wash_DC_CH_97   | Key_west_Florida_USA | 99.941  | Squirres_CR          | 0.059   | Columbus_Georgia_USA | 0       | El_Paso_Texas_USA         | 0       | Patillas_USA_PR           | 0       |
| Wash_DC_CH_98   | Key_west_Florida_USA | 100     | Squirres_CR          | 0       | Columbus_Georgia_USA | 0       | Patillas_USA_PR           | 0       | El_Paso_Texas_USA         | 0       |
| Wash_DC_CH_87   | Key_west_Florida_USA | 100     | Squirres_CR          | 0       | Columbus_Georgia_USA | 0       | Patillas_USA_PR           | 0       | New_Orleans_Louisiana_USA | 0       |
| Wash_DC_DC14_70 | Key_west_Florida_USA | 100     | Columbus_Georgia_USA | 0       | Squirres_CR          | 0       | Patillas_USA_PR           | 0       | New_Orleans_Louisiana_USA | 0       |
| Wash_DC_CH_92   | Key_west_Florida_USA | 100     | Columbus_Georgia_USA | 0       | Squirres_CR          | 0       | Patillas_USA_PR           | 0       | Patillas_USA_PR           | 0       |
| Wash_DC_CH_93   | Key_west_Florida_USA | 100     | Columbus_Georgia_USA | 0       | El_Paso_Texas_USA    | 0       | Patillas_USA_PR           | 0       | Patillas_USA_PR           | 0       |
| Wash_DC_CH_94   | Key_west_Florida_USA | 100     | Squirres_CR          | 0       | Patillas_USA_PR      | 0       | Patillas_USA_PR           | 0       | Patillas_USA_PR           | 0       |
| Wash_DC_DC14_71 | Key_west_Florida_USA | 100     | Squirres_CR          | 0       | Patillas_USA_PR      | 0       | Columbus_Georgia_USA      | 0       | Patillas_USA_PR           | 0       |
| Wash_DC_DC14_73 | Key_west_Florida_USA | 100     | Squirres_CR          | 0       | Patillas_USA_PR      | 0       | Patillas_USA_PR           | 0       | Patillas_USA_PR           | 0       |
| Wash_DC_DC14_75 | Columbus_Georgia_USA | 80.559  | Key_west_Florida_USA | 18.96   | Columbus_Georgia_USA | 0.481   | El_Paso_Texas_USA         | 0       | Patillas_USA_PR           | 0       |
| Wash_DC_DC14_82 | Key_west_Florida_USA | 100     | Columbus_Georgia_USA | 0       | Squirres_CR          | 0       | El_Paso_Texas_USA         | 0       | New_Orleans_Louisiana_USA | 0       |
| Wash_DC_DC14_83 | Key_west_Florida_USA | 97.796  | Columbus_Georgia_USA | 2.204   | Squirres_CR          | 0       | El_Paso_Texas_USA         | 0       | El_Paso_Texas_USA         | 0       |
| Wash_DC_DC14_84 | Key_west_Florida_USA | 100     | Squirres_CR          | 0       | Patillas_USA_PR      | 0       | Columbus_Georgia_USA      | 0       | El_Paso_Texas_USA         | 0       |
| RUN7            |                      |         |                      |         |                      |         |                           |         |                           |         |
| Wash_DC_CH_70   | Columbus_Georgia_USA | 100     | Key_west_Florida_USA | 0       | Patillas_USA_PR      | 0       | Squirres_CR               | 0       | Amacuzac_MEX              | 0       |
| Wash_DC_CH_95   | Columbus_Georgia_USA | 100     | Key_west_Florida_USA | 0       | Squirres_CR          | 0       | El_Paso_Texas_USA         | 0       | New_Orleans_Louisiana_USA | 0       |
| Wash_DC_CH_79   | Key_west_Florida_USA | 100     | Squirres_CR          | 0       | Patillas_USA_PR      | 0       | Columbus_Georgia_USA      | 0       | New_Orleans_Louisiana_USA | 0       |
| Wash_DC_CH_97   | Key_west_Florida_USA | 100     | Columbus_Georgia_USA | 0       | Squirres_CR          | 0       | El_Paso_Texas_USA         | 0       | New_Orleans_Louisiana_USA | 0       |
| Wash_DC_CH_98   | Key_west_Florida_USA | 100     | Columbus_Georgia_USA | 0       | Squirres_CR          | 0       | Patillas_USA_PR           | 0       | New_Orleans_Louisiana_USA | 0       |
| Wash_DC_CH_87   | Key_west_Florida_USA | 100     | Squirres_CR          | 0       | Patillas_USA_PR      | 0       | New_Orleans_Louisiana_USA | 0       | Columbus_Georgia_USA      | 0       |
| Wash_DC_DC14_70 | Columbus_Georgia_USA | 100     | Key_west_Florida_USA | 0       | Patillas_USA_PR      | 0       | Squirres_CR               | 0       | Amacuzac_MEX              | 0       |
| Wash_DC_CH_92   | Key_west_Florida_USA | 100     | Columbus_Georgia_USA | 0       | Squirres_CR          | 0       | El_Paso_Texas_USA         | 0       | New_Orleans_Louisiana_USA | 0       |
| Wash_DC_DC14_82 | Columbus_Georgia_USA | 100     | Key_west_Florida_USA | 0       | Squirres_CR          | 0       | El_Paso_Texas_USA         | 0       | Patillas_USA_PR           | 0       |
| Wash_DC_DC14_83 | Columbus_Georgia_USA | 100     | Key_west_Florida_USA | 0       | Squirres_CR          | 0       | Patillas_USA_PR           | 0       | El_Paso_Texas_USA         | 0       |
| Wash_DC_DC14_84 | Key_west_Florida_USA | 100     | Squirres_CR          | 0       | Columbus_Georgia_USA | 0       | Patillas_USA_PR           | 0       | El_Paso_Texas_USA         | 0       |
| RUN8            |                      |         |                      |         |                      |         |                           |         |                           |         |
| Wash_DC_CH_70   | Columbus_Georgia_USA | 86.653  | Key_west_Florida_USA | 13.347  | Patillas_USA_PR      | 0       | Squirres_CR               | 0       | New_Orleans_Louisiana_USA | 0       |
| Wash_DC_CH_95   | Key_west_Florida_USA | 100     | El_Paso_Texas_USA    | 0       | Squirres_CR          | 0       | Columbus_Georgia_USA      | 0       | New_Orleans_Louisiana_USA | 0       |
| Wash_DC_CH_79   | Key_west_Florida_USA | 100     | Squirres_CR          | 0       | Patillas_USA_PR      | 0       | Columbus_Georgia_USA      | 0       | New_Orleans_Louisiana_USA | 0       |
| Wash_DC_CH_97   | Key_west_Florida_USA | 100     | El_Paso_Texas_USA    | 0       | Squirres_CR          | 0       | Columbus_Georgia_USA      | 0       | Amacuzac_MEX              | 0       |
| Wash_DC_CH_98   | Key_west_Florida_USA | 100     | Columbus_Georgia_USA | 0       | Squirres_CR          | 0       | Patillas_USA_PR           | 0       | El_Paso_Texas_USA         | 0       |
| Wash_DC_CH_87   | Key_west_Florida_USA | 99.988  | Patillas_USA_PR      | 0.002   | Squirres_CR          | 0       | New_Orleans_Louisiana_USA | 0       | Columbus_Georgia_USA      | 0       |
| Wash_DC_DC14_70 | Key_west_Florida_USA | 99.988  | Columbus_Georgia_USA | 0.002   | Patillas_USA_PR      | 0       | Squirres_CR               | 0       | Amacuzac_MEX              | 0       |
| Wash_DC_CH_92   | Key_west_Florida_USA | 100     | Squirres_CR          | 0       | El_Paso_Texas_USA    | 0       | Columbus_Georgia_USA      | 0       | Patillas_USA_PR           | 0       |
| Wash_DC_CH_93   | Squirres_CR          | 87.066  | Key_west_Florida_USA | 12.934  | El_Paso_Texas_USA    | 0       | Columbus_Georgia_USA      | 0       | Patillas_USA_PR           | 0       |
| Wash_DC_CH_94   | Columbus_Georgia_USA | 100     | Key_west_Florida_USA | 0       | El_Paso_Texas_USA    | 0       | Squirres_CR               | 0       | Amacuzac_MEX              | 0       |

(continued)

SUPPLEMENTAL TABLE 3  
Continued

| Assigned sample | Rank 1               | Score % | Rank 2               | Score % | Rank 3               | Score % | Rank 4                    | Score % | Rank 5                    | Score % |
|-----------------|----------------------|---------|----------------------|---------|----------------------|---------|---------------------------|---------|---------------------------|---------|
| Wash_DC_DC14_71 | Key_west_Florida_USA | 100     | Squirres_CR          | 0       | Columbus_Georgia_USA | 0       | New_Orleans_Louisiana_USA | 0       | Patillas_USA_PR           | 0       |
| Wash_DC_DC14_73 | Key_west_Florida_USA | 100     | Squirres_CR          | 0       | Patillas_USA_PR      | 0       | New_Orleans_Louisiana_USA | 0       | Columbus_Georgia_USA      | 0       |
| Wash_DC_DC14_75 | Columbus_Georgia_USA | 100     | Key_west_Florida_USA | 0       | Squirres_CR          | 0       | El_Paso_Texas_USA         | 0       | New_Orleans_Louisiana_USA | 0       |
| Wash_DC_DC14_82 | Key_west_Florida_USA | 100     | Columbus_Georgia_USA | 0       | Squirres_CR          | 0       | Patillas_USA_PR           | 0       | El_Paso_Texas_USA         | 0       |
| Wash_DC_DC14_83 | Columbus_Georgia_USA | 64.844  | Key_west_Florida_USA | 35.156  | Squirres_CR          | 0       | El_Paso_Texas_USA         | 0       | New_Orleans_Louisiana_USA | 0       |
| Wash_DC_DC14_84 | Key_west_Florida_USA | 100     | Squirres_CR          | 0       | Columbus_Georgia_USA | 0       | Patillas_USA_PR           | 0       | El_Paso_Texas_USA         | 0       |
| RUN9            |                      |         |                      |         |                      |         |                           |         |                           |         |
| Wash_DC_CH_70   | Key_west_Florida_USA | 100     | Columbus_Georgia_USA | 0       | Patillas_USA_PR      | 0       | New_Orleans_Louisiana_USA | 0       | Squirres_CR               | 0       |
| Wash_DC_CH_95   | El_Paso_Texas_USA    | 99.215  | Key_west_Florida_USA | 0.785   | Columbus_Georgia_USA | 0       | Squirres_CR               | 0       | New_Orleans_Louisiana_USA | 0       |
| Wash_DC_CH_79   | Key_west_Florida_USA | 100     | Squirres_CR          | 0       | Patillas_USA_PR      | 0       | New_Orleans_Louisiana_USA | 0       | Columbus_Georgia_USA      | 0       |
| Wash_DC_CH_97   | Key_west_Florida_USA | 100     | Squirres_CR          | 0       | Columbus_Georgia_USA | 0       | El_Paso_Texas_USA         | 0       | Patillas_USA_PR           | 0       |
| Wash_DC_CH_98   | Key_west_Florida_USA | 100     | Squirres_CR          | 0       | Patillas_USA_PR      | 0       | New_Orleans_Louisiana_USA | 0       | Columbus_Georgia_USA      | 0       |
| Wash_DC_CH_87   | Key_west_Florida_USA | 100     | Squirres_CR          | 0       | Patillas_USA_PR      | 0       | New_Orleans_Louisiana_USA | 0       | Columbus_Georgia_USA      | 0       |
| Wash_DC_DC14_70 | Key_west_Florida_USA | 100     | Columbus_Georgia_USA | 0       | Patillas_USA_PR      | 0       | New_Orleans_Louisiana_USA | 0       | Squirres_CR               | 0       |
| Wash_DC_CH_92   | Key_west_Florida_USA | 100     | Squirres_CR          | 0       | El_Paso_Texas_USA    | 0       | Columbus_Georgia_USA      | 0       | Patillas_USA_PR           | 0       |
| Wash_DC_CH_93   | Squirres_CR          | 100     | Key_west_Florida_USA | 0       | Columbus_Georgia_USA | 0       | Rio_de_Janeiro_BRA        | 0       | El_Paso_Texas_USA         | 0       |
| Wash_DC_CH_94   | Columbus_Georgia_USA | 99.984  | Key_west_Florida_USA | 0.006   | Squirres_CR          | 0       | El_Paso_Texas_USA         | 0       | New_Orleans_Louisiana_USA | 0       |
| Wash_DC_DC14_71 | Key_west_Florida_USA | 100     | Squirres_CR          | 0       | Columbus_Georgia_USA | 0       | New_Orleans_Louisiana_USA | 0       | Patillas_USA_PR           | 0       |
| Wash_DC_DC14_73 | Key_west_Florida_USA | 100     | Squirres_CR          | 0       | Patillas_USA_PR      | 0       | Columbus_Georgia_USA      | 0       | New_Orleans_Louisiana_USA | 0       |
| Wash_DC_DC14_75 | Key_west_Florida_USA | 100     | Columbus_Georgia_USA | 0       | Squirres_CR          | 0       | New_Orleans_Louisiana_USA | 0       | El_Paso_Texas_USA         | 0       |
| Wash_DC_DC14_82 | Key_west_Florida_USA | 100     | Columbus_Georgia_USA | 0       | Squirres_CR          | 0       | New_Orleans_Louisiana_USA | 0       | El_Paso_Texas_USA         | 0       |
| Wash_DC_DC14_83 | Key_west_Florida_USA | 100     | Columbus_Georgia_USA | 0       | Squirres_CR          | 0       | El_Paso_Texas_USA         | 0       | New_Orleans_Louisiana_USA | 0       |
| Wash_DC_DC14_84 | Key_west_Florida_USA | 100     | Squirres_CR          | 0       | Patillas_USA_PR      | 0       | Columbus_Georgia_USA      | 0       | El_Paso_Texas_USA         | 0       |
| RUN10           |                      |         |                      |         |                      |         |                           |         |                           |         |
| Wash_DC_CH_70   | Key_west_Florida_USA | 100     | Columbus_Georgia_USA | 0       | Squirres_CR          | 0       | Patillas_USA_PR           | 0       | Amacuzac_MEX              | 0       |
| Wash_DC_CH_95   | Key_west_Florida_USA | 100     | Columbus_Georgia_USA | 0       | Squirres_CR          | 0       | El_Paso_Texas_USA         | 0       | New_Orleans_Louisiana_USA | 0       |
| Wash_DC_CH_79   | Key_west_Florida_USA | 100     | Squirres_CR          | 0       | Patillas_USA_PR      | 0       | Columbus_Georgia_USA      | 0       | New_Orleans_Louisiana_USA | 0       |
| Wash_DC_CH_97   | Key_west_Florida_USA | 100     | Columbus_Georgia_USA | 0       | Squirres_CR          | 0       | El_Paso_Texas_USA         | 0       | Amacuzac_MEX              | 0       |
| Wash_DC_CH_98   | Key_west_Florida_USA | 100     | Columbus_Georgia_USA | 0       | Squirres_CR          | 0       | Patillas_USA_PR           | 0       | New_Orleans_Louisiana_USA | 0       |
| Wash_DC_CH_87   | Key_west_Florida_USA | 100     | Squirres_CR          | 0       | Patillas_USA_PR      | 0       | Columbus_Georgia_USA      | 0       | New_Orleans_Louisiana_USA | 0       |
| Wash_DC_DC14_70 | Key_west_Florida_USA | 100     | Columbus_Georgia_USA | 0       | Squirres_CR          | 0       | Patillas_USA_PR           | 0       | Amacuzac_MEX              | 0       |
| Wash_DC_CH_82   | Key_west_Florida_USA | 100     | Squirres_CR          | 0       | Columbus_Georgia_USA | 0       | El_Paso_Texas_USA         | 0       | Patillas_USA_PR           | 0       |
| Wash_DC_CH_93   | Squirres_CR          | 100     | Columbus_Georgia_USA | 0       | Key_west_Florida_USA | 0       | El_Paso_Texas_USA         | 0       | New_Orleans_Louisiana_USA | 0       |
| Wash_DC_CH_94   | Key_west_Florida_USA | 100     | Columbus_Georgia_USA | 0       | Squirres_CR          | 0       | Patillas_USA_PR           | 0       | New_Orleans_Louisiana_USA | 0       |
| Wash_DC_DC14_71 | Key_west_Florida_USA | 100     | Squirres_CR          | 0       | Columbus_Georgia_USA | 0       | New_Orleans_Louisiana_USA | 0       | Patillas_USA_PR           | 0       |
| Wash_DC_DC14_73 | Key_west_Florida_USA | 100     | Squirres_CR          | 0       | Patillas_USA_PR      | 0       | Columbus_Georgia_USA      | 0       | New_Orleans_Louisiana_USA | 0       |
| Wash_DC_DC14_75 | Columbus_Georgia_USA | 100     | Key_west_Florida_USA | 0       | Squirres_CR          | 0       | El_Paso_Texas_USA         | 0       | New_Orleans_Louisiana_USA | 0       |
| Wash_DC_DC14_82 | Key_west_Florida_USA | 100     | Columbus_Georgia_USA | 0       | Squirres_CR          | 0       | Patillas_USA_PR           | 0       | Dominica_DOM              | 0       |
| Wash_DC_DC14_83 | Columbus_Georgia_USA | 100     | Key_west_Florida_USA | 0       | Squirres_CR          | 0       | El_Paso_Texas_USA         | 0       | New_Orleans_Louisiana_USA | 0       |
| Wash_DC_DC14_84 | Key_west_Florida_USA | 100     | Patillas_USA_PR      | 0       | Squirres_CR          | 0       | El_Paso_Texas_USA         | 0       | Columbus_Georgia_USA      | 0       |
